# Supplementary material for: Preparation and characterization of novel naphthyl epoxy resin containing 4-fluorobenzoyl side chains for low-k dielectrics application
Source: Royal Society of Chemistry journal article supplement (doi:10.1039/c7ra09941j), 2017-01-01
Supplement: c7ra09941j1.pdf [file c7ra09941j1.pdf]

# Preparation and characterization of novel naphthyl epoxy resin containing 4-fluorobenzoyl side chains for low-*k* dielectrics application

Tianyi Na<sup>a</sup>, Hao Jianga, Liang Zhao<sup>a</sup>, Chengji Zhao<sup>a\*</sup>

*College of Chemistry, Jilin University, Changchun 130012, P. R. China*

\*E-mail: [zhaochengji@jlu.edu.cn](mailto:zhaochengji@jlu.edu.cn); Fax: +86-431-85168870; Tel: +86-431-85168870

## Supporting Information

**Table S1.** Chemical shift and integral area of the monomer DMNF.

|                      |           |           |           |           |
|----------------------|-----------|-----------|-----------|-----------|
| Chemical shift (ppm) | 7.82-7.87 | 7.51-7.58 | 7.34-7.40 | 3.72-3.78 |
| Integral area        | 1         | 1.03      | 1.05      | 1.52      |

**Table S2.** Chemical shift and integral area of the monomer DHNF.

|                      |            |           |           |           |
|----------------------|------------|-----------|-----------|-----------|
| Chemical shift (ppm) | 9.90-10.02 | 7.81-7.92 | 7.28-7.44 | 7.11-7.23 |
| Integral area        | 1          | 2.05      | 2.12      | 2.04      |

**Table S3.** Chemical shift and integral area of the monomer DGENF.

|                      |           |           |           |           |           |           |           |           |
|----------------------|-----------|-----------|-----------|-----------|-----------|-----------|-----------|-----------|
| Chemical shift (ppm) | 7.82-7.92 | 7.50-7.62 | 7.30-7.42 | 4.30-4.42 | 3.92-4.03 | 2.92-3.04 | 2.60-2.68 | 2.36-2.45 |
| Integral area        | 1         | 1.05      | 1.06      | 0.53      | 0.55      | 0.58      | 0.54      | 0.54      |

**Table S4.** Wavenumbers and structures of the monomer DGENF for FTIR.

|                                |                   |                |              |
|--------------------------------|-------------------|----------------|--------------|
| Structure                      | naphthalene rings | carbonyl group | oxirane ring |
| Wavenumber (cm <sup>-1</sup> ) | 1500-1600         | 1740           | 912          |
